# Supplementary material for: Neural development in the tardigrade Hypsibius dujardini based on anti-acetylated α-tubulin immunolabeling
Source: PubMed Central journal article supplement (PMC4458024; doi:10.1186/s13227-015-0008-4), 2015-04-25

**A**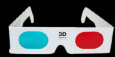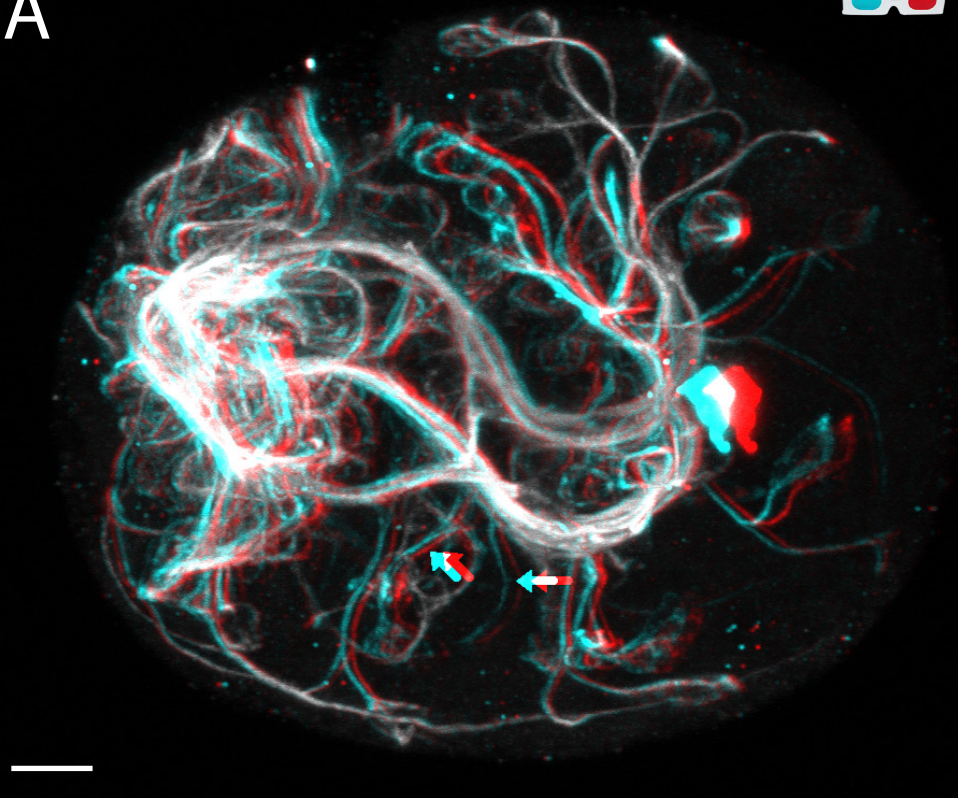**B**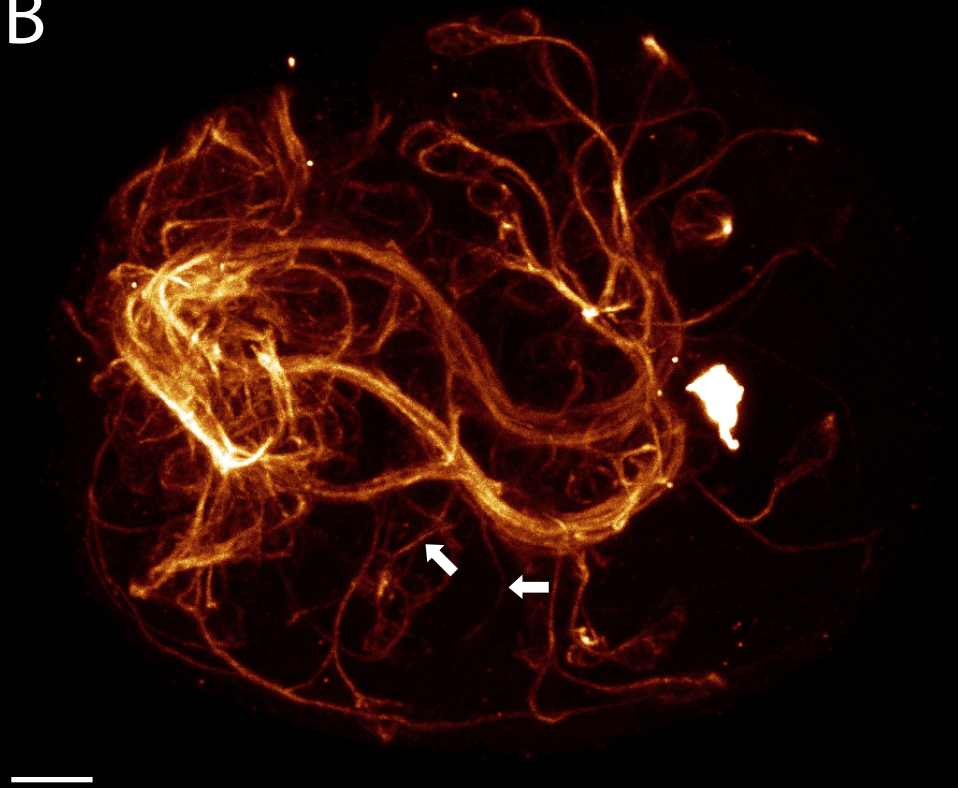

Supplement: 13227_2015_8_MOESM7_ESM.pdf [file 13227_2015_8_MOESM7_ESM.pdf]
